# Supplementary material
Source: Frontiers journal article supplement (https://www.frontiersin.org/articles/526805)
Supplement: Data_Sheet_1.PDF [file Data_Sheet_1.PDF]

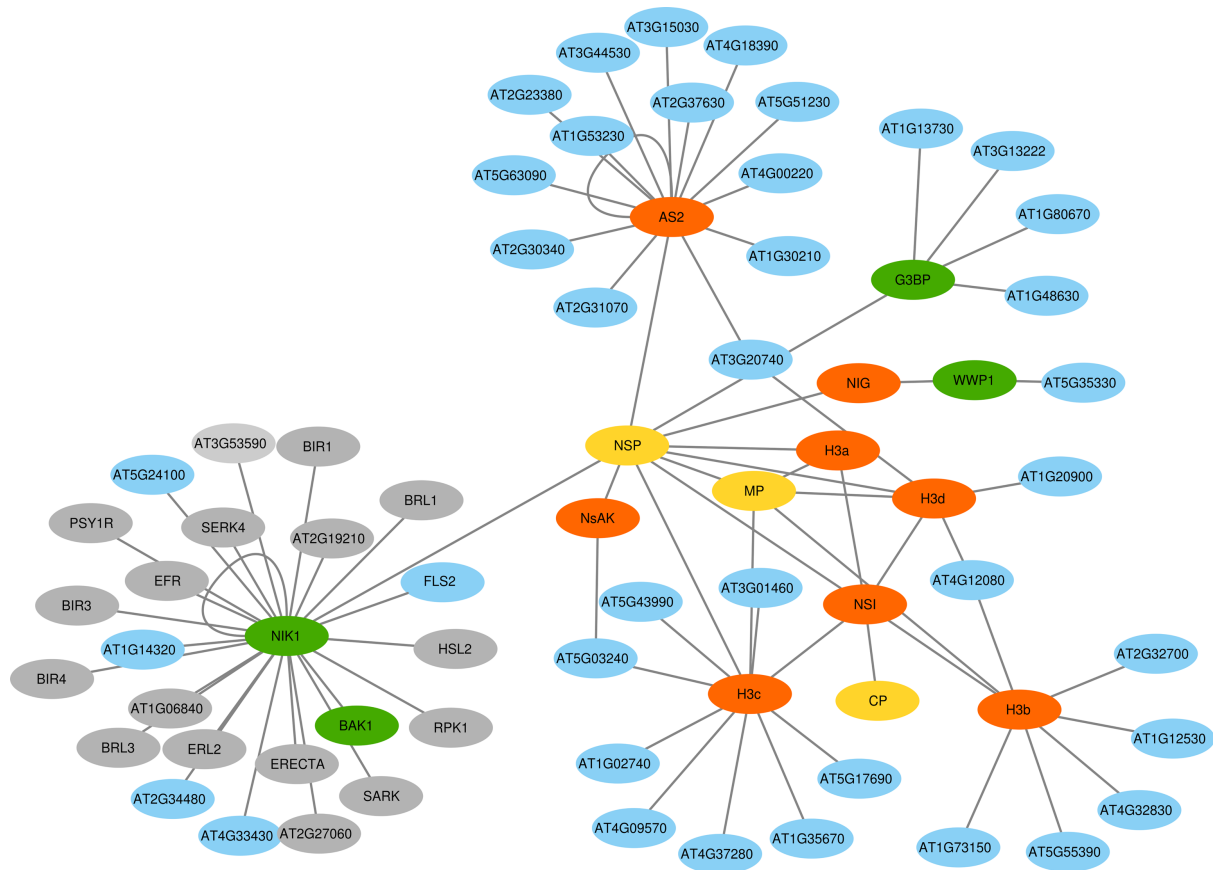

Supplementary Figure 1. NSP-Arabidopsis protein-protein interaction network. The NSP-interacting proteins were integrated into the Arabidopsis interactome and the LRR-based cell surface interaction network (CSILRR). The network displays a firework topology, which was assembled by the Cytoscape software. The viral proteins, NSP, MP and CP, are represented in yellow. NSP-interacting proteins displaying an antiviral function are depicted in green and with proviral function in orange. Blue proteins were derived from the Arabidopsis interactome and gray proteins, from CSILRR.
